# Supplementary material
Source: HighWire-hosted journal article supplement (https://www.cmaj.ca/highwire/filestream/58992/field_highwire_adjunct_files/3/sleep-topfner-4-at.pdf)
Supplement: sleep-topfner-4-at.pdf [file sleep-topfner-4-at.pdf]

## Appendix 4 (as supplied by the author): Technical failures reported in the included studies

| Study                                     | In Lab Level-1          |                       |                      | In-Lab Level-3          |                       |                      | At-Home                 |                       |                      |
|-------------------------------------------|-------------------------|-----------------------|----------------------|-------------------------|-----------------------|----------------------|-------------------------|-----------------------|----------------------|
|                                           | Equipment related error | Patient related error | Intolerant to device | Equipment related error | Patient related error | Intolerant to device | Equipment related error | Patient related error | Intolerant to device |
| Abraham et al. <sup>(1)</sup>             | 0                       | 0                     | 0                    | 0                       | 0                     | 0                    | 2                       | 0                     | 0                    |
| Andreu et al. <sup>(2)</sup>              | 1                       | 0                     | 0                    | 0                       | 0                     | 0                    | 5                       | 0                     | 0                    |
| Ayappa et al. <sup>(3)</sup>              | 0                       | 0                     | 0                    | 0                       | 0                     | 0                    | 2                       | 6                     | 5                    |
| Campbell et al. <sup>(4)</sup>            | 2                       | 0                     | 0                    | 0                       | 0                     | 0                    | 5                       | 0                     | 0                    |
| Candela et al. <sup>(5)</sup>             | 0                       | 0                     | 0                    | 0                       | 0                     | 0                    | 4                       | 0                     | 0                    |
| Chang et al. <sup>(6)</sup>               | 0                       | 0                     | 0                    | 0                       | 0                     | 0                    | 8                       | 0                     | 0                    |
| ChelioutHeraut et al. <sup>(7)</sup>      | 2                       | 0                     | 0                    | 0                       | 0                     | 0                    | 5                       | 0                     | 0                    |
| Churchward et al. <sup>(8)</sup>          | 0                       | 0                     | 0                    | 0                       | 0                     | 0                    | 8                       | 0                     | 0                    |
| Danzi-Soares et al. <sup>(9)</sup>        | 1                       | 0                     | 0                    | 0                       | 0                     | 0                    | 4                       | 0                     | 0                    |
| Driver et al. <sup>(10)</sup>             | 0                       | 0                     | 0                    | 0                       | 0                     | 0                    | 7                       | 0                     | 0                    |
| Furokawa et al. <sup>(11)</sup>           | 6                       | 0                     | 0                    | 0                       | 0                     | 0                    | 0                       | 0                     | 0                    |
| Garcia-Diaz et al. <sup>(12)</sup>        | 1                       | 0                     | 0                    | 0                       | 0                     | 0                    | 0                       | 0                     | 0                    |
| Gjevre et al. <sup>(13)</sup>             | 0                       | 0                     | 0                    | 0                       | 0                     | 0                    | 3                       | 0                     | 0                    |
| Goordrich et al. <sup>(14)</sup>          | 1                       | 0                     | 0                    | 0                       | 0                     | 0                    | 1                       | 0                     | 0                    |
| Grover et al. <sup>(15)</sup>             | 0                       | 0                     | 0                    | 0                       | 0                     | 0                    | 0                       | 1                     | 0                    |
| Masa et al. <sup>(16)</sup>               | 0                       | 0                     | 0                    | 0                       | 0                     | 0                    | 19                      | 0                     | 0                    |
| Nakayama et al. <sup>(17)</sup>           | 0                       | 0                     | 0                    | 0                       | 0                     | 0                    | 26                      | 0                     | 0                    |
| Ng et al. <sup>(18)</sup>                 | 0                       | 0                     | 0                    | 9                       | 1                     | 0                    | 0                       | 0                     | 0                    |
| NG et al. <sup>(19)</sup>                 | 0                       | 0                     | 0                    | 0                       | 0                     | 0                    | 5                       | 0                     | 0                    |
| Nigro et al. <sup>(20)</sup>              | 1                       | 0                     | 0                    | 0                       | 0                     | 0                    | 8                       | 0                     | 0                    |
| Onder et al. <sup>(21)</sup>              | 0                       | 0                     | 0                    | 0                       | 0                     | 0                    | 3                       | 0                     | 0                    |
| Quintana-Gallego et al. <sup>(22)</sup>   | 0                       | 0                     | 0                    | 0                       | 0                     | 0                    | 5                       | 0                     | 0                    |
| Rosen et al. <sup>(23)</sup>              | 0                       | 0                     | 0                    | 0                       | 0                     | 0                    | 13                      | 0                     | 0                    |
| Santos-Silva et al. <sup>(24)</sup>       | 0                       | 0                     | 0                    | 0                       | 0                     | 0                    | 2                       | 0                     | 0                    |
| Skomro et al. <sup>(25)</sup>             | 0                       | 0                     | 0                    | 0                       | 0                     | 0                    | 13                      | 0                     | 0                    |
| Smith et al. <sup>(26)</sup>              | 0                       | 0                     | 0                    | 0                       | 0                     | 0                    | 4                       | 1                     | 0                    |
| Su et al. <sup>(27)</sup>                 | 3                       | 0                     | 0                    | 0                       | 0                     | 0                    | 1                       | 0                     | 0                    |
| Tiihonen et al. <sup>(28)</sup>           | 0                       | 0                     | 0                    | 0                       | 0                     | 0                    | 9                       | 0                     | 0                    |
| To et al. <sup>(29)</sup>                 | 13                      | 0                     | 0                    | 26                      | 0                     | 0                    | 0                       | 0                     | 0                    |
| Tonelli et al. <sup>(30)</sup>            | 0                       | 0                     | 0                    | 0                       | 0                     | 0                    | 21                      | 1                     | 1                    |
| Yin et al. <sup>(31)</sup>                | 0                       | 0                     | 0                    | 0                       | 0                     | 0                    | 21                      | 0                     | 0                    |
| <b>Total</b>                              | <b>17</b>               | <b>0</b>              | <b>0</b>             | <b>35</b>               | <b>1</b>              | <b>0</b>             | <b>204</b>              | <b>9</b>              | <b>6</b>             |
| <b>Population</b>                         | <b>3789</b>             |                       |                      | <b>2783</b>             |                       |                      | <b>2135</b>             |                       |                      |
| <b>Total % of lost data by population</b> | <b>0.44%</b>            |                       |                      | <b>1.30%</b>            |                       |                      | <b>10.25%</b>           |                       |                      |

### References

- (1) Abraham WT, Trupp RJ, Phillips B, Bourge RC, Bailey B, Harding SM, et al. Validation and clinical utility of a simple in-home testing tool for sleep-disordered breathing and

arrhythmias in heart failure: results of the Sleep Events, Arrhythmias, and Respiratory Analysis in Congestive Heart Failure (SEARCH) study. *Congest Heart Fail* 2006;12(5):241-7.

(2) Andreu AL, Chiner E, Sancho-Chust JN, Pastor E, Llombart M, Gomez-Merino E, et al. Effect of an ambulatory diagnostic and treatment programme in patients with sleep apnoea. *Eur Respir J* 2012;39(2):305-12.

(3) Ayappa I, Norman RG, Seelall V, Rapoport DM. Validation of a self-applied unattended monitor for sleep disordered breathing. *J Clin Sleep Med* 2008;4(1):26-37.

(4) Campbell AJ, Neill AM. Home set-up polysomnography in the assessment of suspected obstructive sleep apnea. *J Sleep Res* 2011;20(1 Pt 2):207-13.

(5) Candela A, Hernandez L, Asensio S, Sanchez-Paya J, Vila J, Benito N, et al. Validation of a respiratory polygraphy system in the diagnosis of sleep apnea syndrome. *Arch Bronconeumol* 2005;41(2):71-7.

(6) Chung F, Liao P, Sun Y, Amirshahi B, Fazel H, Shapiro CM, et al. Perioperative practical experiences in using a level 2 portable polysomnography. *Sleep Breath* 2011;15(3):367-75.

(7) Cheliout-Heraut F, Senny F, Djouadi F, Ouayoun M, Bour F. Obstructive sleep apnoea syndrome: comparison between polysomnography and portable sleep monitoring based on jaw recordings. *Neurophysiol Clin* 2011;41(4):191-8.

(8) Churchward TJ, O'Donoghue F, Rochford P, Pierce RJ, Barnes M, Higgins S. Diagnostic accuracy and cost effectiveness of home-based PSG in OSA [abstract]. *Sleep Biol Rhythms* 2006;4(Suppl):A11 (Abstract no. 0-11).

(9) Danzi-Soares NJ, Genta PR, Nerbass FB, Pedrosa RP, Soares FS, Cesar LA, et al. Obstructive sleep apnea is common among patients referred for coronary artery bypass grafting and can be diagnosed by portable monitoring. *Coron Artery Dis* 2012;23(1):31-8.

(10) Driver HS, Pereira EJ, Bjerring K, Toop F, Stewart SC, Munt PW, et al. Validation of the MediByte(R) type 3 portable monitor compared with polysomnography for screening of obstructive sleep apnea. *Can Respir J* 2011;18(3):137-43.

(11) Furukawa T, Suzuki M, Funatogawa I, Isshiki T, Miyazawa Y, Teramoto T, et al. Screening method for severe sleep-disordered breathing in hypertensive patients without daytime sleepiness. *J Cardiol* 2009;53(1):79-85.

- (12) Garcia-Diaz E, Quintana-Gallego E, Ruiz A, Carmona-Bernal C, Sanchez-Armengol A, Botebol-Benhamou G, et al. Respiratory polygraphy with actigraphy in the diagnosis of sleep apnea-hypopnea syndrome. *Chest* 2007;131(3):725-32.
- (13) Gjevre JA, Taylor-Gjevre RM, Skomro R, Reid J, Fenton M, Cotton D. Comparison of polysomnographic and portable home monitoring assessments of obstructive sleep apnea in Saskatchewan women. *Can Respir J* 2011;18(5):271-4.
- (14) Goodrich S, Orr WC. An investigation of the validity of the Lifeshirt in comparison to standard polysomnography in the detection of obstructive sleep apnea. *Sleep Med* 2009;10(1):118-22.
- (15) Grover S, Cady M. A user-friendly device for home monitoring of sleep disorders [abstract]. *Sleep* 2009;32(Suppl):A371 (Abstract no. 1136).
- (16) Masa JF, Corral J, Pereira R, Duran-Cantolla J, Cabello M, Hernandez-Blasco L, et al. Therapeutic decision-making for sleep apnea and hypopnea syndrome using home respiratory polygraphy: a large multicentric study. *Am J Respir Crit Care Med* 2011;184(8):964-71.
- (17) Nakayama-Ashida Y, Takegami M, Chin K, Sumi K, Nakamura T, Takahashi K, et al. Sleep-disordered breathing in the usual lifestyle setting as detected with home monitoring in a population of working men in Japan. *Sleep* 2008;31(3):419-25.
- (18) Ng SS, Chan TO, To KW, Ngai J, Tung A, Ko FW, et al. Validation of Embletta portable diagnostic system for identifying patients with suspected obstructive sleep apnoea syndrome (OSAS). *Respirology* 2010;15(2):336-42.
- (19) Ng SS, Chan TO, To KW, Ngai J, Tung A, Ko FW, et al. Validation of a portable recording device (ApneaLink) for identifying patients with suspected obstructive sleep apnoea syndrome. *Intern Med J* 2009;39(11):757-62.
- (20) Nigro CA, Serrano F, Aimaretti S, Gonzalez S, Codinardo C, Rhodius E. Utility of ApneaLink for the diagnosis of sleep apnea-hypopnea syndrome. *Medicina (B Aires)* 2010;70(1):53-9.
- (21) Onder NS, Akpınar ME, Yigit O, Gor AP. Watch peripheral arterial tonometry in the diagnosis of obstructive sleep apnea: Influence of aging. *Laryngoscope* 2012.
- (22) Quintana-Gallego E, Villa-Gil M, Carmona-Bernal C, Botebol-Benhamou G, Martinez-Martinez A, Sanchez-Armengol A, et al. Home respiratory polygraphy for diagnosis of sleep-disordered breathing in heart failure. *Eur Respir J* 2004;24(3):443-8.

- (23) Rosen CL, Auckley D, Benca R, Foldvary-Schaefer N, Iber C, Kapur V, et al. A multisite randomized trial of portable sleep studies and positive airway pressure autotitration versus laboratory-based polysomnography for the diagnosis and treatment of obstructive sleep apnea: the HomePAP Study. *Sleep* 2012;35(6):757-67.
- (24) Santos-Silva R, Sartori DE, Truksinas V, Truksinas E, Alonso FF, Tufik S, et al. Validation of a portable monitoring system for the diagnosis of obstructive sleep apnea syndrome. *Sleep* 2009;32(5):629-36.
- (25) Skomro R, Cotton D, Gjevre J, Hill F, King L, Mink J, et al. Diagnosis of obstructive sleep apnea using unattended level III monitoring [abstract]. *Sleep* 2005;28(Suppl):A164 (Abstract no. 0483).
- (26) Smith LA, Chong DW, Vennelle M, Denvir MA, Newby DE, Douglas NJ. Diagnosis of sleep-disordered breathing in patients with chronic heart failure: evaluation of a portable limited sleep study system. *J Sleep Res* 2007;16(4):428-35.
- (27) Su S, Baroody FM, Kohrman M, Suskind D. A comparison of polysomnography and a portable home sleep study in the diagnosis of obstructive sleep apnea syndrome. *Otolaryngol Head Neck Surg* 2004;131(6):844-50.
- (28) Tiihonen P, Paakkonen A, Mervaala E, Hukkanen T, Toyras J. Design, construction and evaluation of an ambulatory device for screening of sleep apnea. *Med Biol Eng Comput* 2009;47(1):59-66.
- (29) To KW, Chan WC, Chan TO, Tung A, Ngai J, Ng S, et al. Validation study of a portable monitoring device for identifying OSA in a symptomatic patient population. *Respirology* 2009;14(2):270-5.
- (30) Tonelli de Oliveira AC, Martinez D, Vasconcelos LF, Goncalves SC, Lenz MC, Fuchs SC, et al. Diagnosis of obstructive sleep apnea syndrome and its outcomes with home portable monitoring. *Chest* 2009;135(2):330-6.
- (31) Yin M, Miyazaki S, Ishikawa K. Evaluation of type 3 portable monitoring in unattended home setting for suspected sleep apnea: factors that may affect its accuracy. *Otolaryngol Head Neck Surg* 2006;134(2):204-9.
